# Supplementary material for: Selective adsorption of polycyclic aromatic hydrocarbons by isostructural hydrogen-bonded organic frameworks
Source: Royal Society of Chemistry journal article supplement (doi:10.1039/d3cc03131d), 2023-01-01
Supplement: d3cc03131d1.pdf [file d3cc03131d1.pdf]

## Electronic Supplementary Information

### Selective Adsorption of Polycyclic Aromatic Hydrocarbons by Isostructural Hydrogen-Bonded Organic Frameworks

Peng Cui,<sup>a,b,c\*</sup> Qiang Zhu,<sup>b</sup> Fangfang Zhang,<sup>a</sup> Dongni Liu,<sup>a,d</sup> Wenshuai Zhu,<sup>a,c\*</sup>

<sup>a</sup> School of Chemistry and Chemical Engineering, Jiangsu University, Zhenjiang, 212013, PR China.

<sup>b</sup> Department of Chemistry and Materials Innovation Factory, University of Liverpool, Liverpool, L7 3NY, UK.

<sup>c</sup> College of Chemical Engineering and Environment, State Key Laboratory of Heavy Oil Processing, China University of Petroleum-Beijing, Beijing, 102249, PR China

<sup>d</sup> School of Materials Science and Engineering, Jiangsu University, Zhenjiang, 212013, PR China

**This file includes:**

Materials and Methods

Figures S1-S14.

Table of Contents:

**1.0 Materials and Methods**

**2.0 Supplementary Data**

## 1. Materials and Methods

### 1.1 Materials

All chemicals and solvents were obtained from Sigma-Aldrich, Fisher, and Alfa Aesar. All chemicals and solvents were used as received. All gases for sorption analysis were supplied by BOC at a purity of  $\geq 99.999\%$ . Biphenyl-3,3',5,5'-tetra-carboxylic acid (**BPTCA**) was purchased from Manchester Organics, and [1,1':4',1''] terphenyl-3,3'',5,5''-tetracarboxylic acid (**TPTCA**) were purchased from Sigma-Aldrich.

### 1.2 General Methods

#### 1.2.1. Powder X-ray Diffraction (PXRD)

PXRD patterns were collected in transmission mode on samples held on thin Mylar film in aluminium well plates on a Panalytical Empyrean diffractometer, equipped with a high throughput screening XYZ stage, X-ray focusing mirror, and PIXcel detector, using Cu-K $\alpha$  ( $\lambda = 1.541 \text{ \AA}$ ) radiation. Unless stated, PXRD patterns were recorded at room temperature. Diffraction patterns were measured over the  $2\theta$  range  $2\text{--}40^\circ$ , in  $0.013^\circ$  steps, for 30 minutes.

#### 1.1.2. Single Crystal X-ray Diffraction (SC-XRD)

SC-XRD data sets were measured on a Rigaku MicroMax-007 HF rotating anode diffractometer (Mo-K $\alpha$  radiation,  $\lambda = 0.71073 \text{ \AA}$ , Kappa 4-circle goniometer, Rigaku Saturn724+ detector); or at beamline I19, Diamond Light Source, Didcot, UK using silicon double crystal monochromated synchrotron radiation ( $\lambda = 0.6889 \text{ \AA}$ , Pilatus 2M detector). For synchrotron X-ray data collected at Diamond Light Source ( $\lambda = 0.6889 \text{ \AA}$ ), data reduction and absorption corrections were performed with xia2.<sup>3</sup> Structures were solved with SHELXT,<sup>4</sup> or by direct methods using SHELXS,<sup>5</sup> and refined by full-matrix least-squares on  $|F|^2$  by SHELXL,<sup>6</sup> interfaced through the programme OLEX2.<sup>7</sup> Supplementary CIF files that include structure factors and responses to checkCIF alerts are available free of charge from the Cambridge Crystallographic Data Centre (CCDC) via [www.ccdc.cam.ac.uk/data\\_request/cif](http://www.ccdc.cam.ac.uk/data_request/cif).

#### 1.1.3 Gas Sorption Analysis

Surface areas were measured by nitrogen sorption at 77.3 K. Powder samples were degassed on the analysis port under vacuum. Isotherm measurements were performed using a Micromeritics 2420 surface characterisation analyser equipped with a Cold-Edge technologies liquid helium cryostat chiller unit for temperature control.

#### 1.1.4 Nuclear Magnetic Resonance (NMR)

NMR spectra were recorded on a Bruker 400 NMR spectrometer at 400 MHz ( $^1\text{H}$ ) with deuterated DMSO as solvents.

#### 1.1.5 Gas Chromatography (GC)

The residual concentrations of PAHs in the feedstock solvent were determined by an Agilent 7890A instrument with a flame ionisation detector (FID) with tetradecane as the internal standard. (HP-5 column, 30 m × 0.32 mm i.d. × 0.25 mm). 3 mg **BPTCA** or **TPTCA** solid was added to an *n*-hexadecane solution (1 mL) that contained **NA** or **AN** at a concentration of 200 ppm. The residual concentration of **NA** and **AN** in *n*-hexadecane after being immersed in HOFs for 3 hrs to reach adsorption equilibrium was tested. Then the adsorption capacity was then calculated.

#### **1.1.6 Ultraviolet spectrum (UV)**

UV-Visible absorption spectra were measured on an Agilent Cary 5000 UV-Vis Spectrometer.

## 2 Supplementary Data

### 2.1 Crystallisation of BPTCA-1

1 mg of **BPTCA** molecule was dissolved in 1 mL DMF in a small vial at RT. The vial was then inserted into a larger vial that contained 10 mL of anti-solvent. Here, the low boiling point organic solvents,  $\text{CHCl}_3$ , methanol, diethyl ether, ethyl acetate, and acetone, were used in the crystallisation procedure, and the small vials were left open to let the anti-solvents diffuse into the DMF solution. At the same time, the larger vial was sealed and left at RT. After two weeks, transparent colorless needle shape crystals (**BPTCA-1**) crystallised from DMF/ $\text{CHCl}_3$  system, but no particles were found in the other vials.

Crystal data for **BPTCA-1** (100 K): Formula  $\text{C}_{16}\text{H}_{10}\text{O}_8$ ;  $M = 330.24$ , orthorhombic  $Pnna$ , colorless block shape crystals;  $a = 15.2243(19) \text{ \AA}$ ,  $b = 7.1637(13) \text{ \AA}$ ,  $c = 17.5962(19) \text{ \AA}$ ;  $V = 1919.1(5) \text{ \AA}^3$ ;  $\rho = 1.143 \text{ g/cm}^3$ ;  $Z = 4$ ;  $\mu(\text{Mo-K}\alpha) = 0.094 \text{ mm}^{-1}$ ;  $F(000) = 680$ ; crystal size =  $0.032 \times 0.022 \times 0.019 \text{ mm}$ ;  $T = 100(2) \text{ K}$ . 2213 reflections measured ( $4.66 < 2\theta < 56.83^\circ$ ), 1911 unique ( $R_{int} = 0.0922$ ), 1529 ( $I > 2\sigma(I)$ );  $R_1 = 0.0919$  for observed and  $R_1 = 0.1190$  for all reflections;  $wR_2 = 0.2457$  for all reflections; max/min difference electron density =  $0.466$  and  $-0.456 \text{ e}\cdot\text{\AA}^{-3}$ ; data/restraints/parameters = 2213/0/115; GOF = 1.048. CCDC No. 2277044.

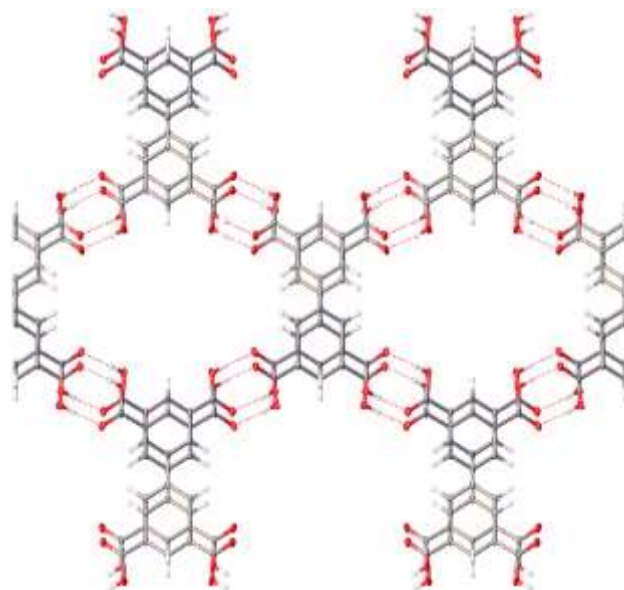

**Figure S1.** Crystal packing diagram of **BPTCA-1** recorded at 100 K and viewed along the  $b$ -axis. Hydrogen bonds are shown with red dashed lines. Grey: carbon, red: oxygen, white: hydrogen.

## 2.2 Formation of BPTCA-2

Firstly, the DMF and chloroform crystallisation solvents were removed with a syringe and 10 mL *n*-pentane was added to immerse the crystals fully. The *n*-pentane was refreshed every 12 hrs, and after using *n*-pentane to exchange the solvents for 5 days, the crystals were degassed at RT for 2 hrs under a dynamic vacuum to afford the activated crystals, **BPTCA-2** (yield: 78 %).

Crystal data for **BPTCA-2** (292 K): Formula  $C_{24}H_{14}O_{12}$ ;  $M = 494.35$ , monoclinic  $C2/c$ , colorless block shape crystals;  $a = 10.8266(7) \text{ \AA}$ ,  $b = 31.5566(14) \text{ \AA}$ ,  $c = 18.5503(11) \text{ \AA}$ ;  $\beta = 105.143(7)^\circ$ ;  $V = 6117.7(6) \text{ \AA}^3$ ;  $\rho = 1.073 \text{ g/cm}^3$ ;  $Z = 8$ ;  $\mu(\text{Mo-K}\alpha) = 0.088 \text{ mm}^{-1}$ ;  $F(000) = 2040$ ; crystal size =  $0.052 \times 0.016 \times 0.012 \text{ mm}$ ;  $T = 292(5) \text{ K}$ . 13190 reflections measured ( $3.46 < 2\theta < 60.11^\circ$ ), 6797 unique ( $R_{int} = 0.028$ ), 6259 ( $I > 2\sigma(I)$ );  $R_1 = 0.0699$  for observed and  $R_1 = 0.1078$  for all reflections;  $wR_2 = 0.2436$  for all reflections; max/min difference electron density =  $0.487$  and  $-0.252 \text{ e}\cdot\text{\AA}^{-3}$ ; data/restraints/parameters = 13190/0/332; GOF = 0.964. CCDC No. 2277046.

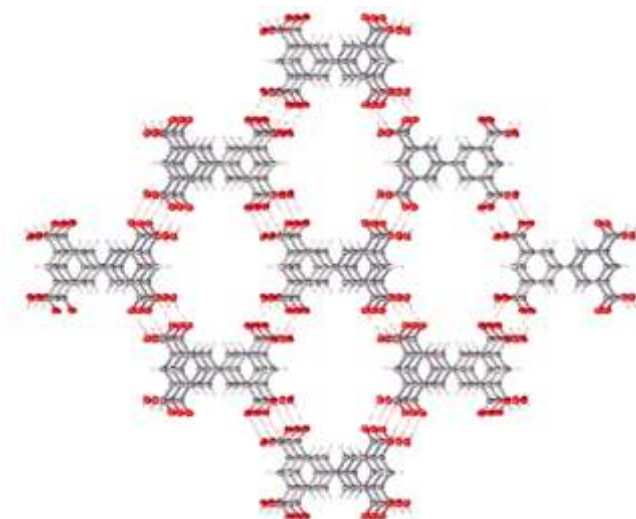

**Figure S2.** Crystal packing diagram of **BPTCA-2** recorded at 292 K viewed along the *a* axis. Hydrogen bonds are shown with red dashed lines. Grey: carbon, red: oxygen, white: hydrogen.

### 2.3 Crystallisation of TPTCA-1

1 mg of **TPTCA** was dissolved in 1 mL of DMF in a small vial at RT. This vial was then inserted into a larger vial that contained 10 mL of  $\text{CHCl}_3$ . The vial was left at RT for two weeks, and afterwards, transparent colorless needle shape crystals of **TPTCA-1** were found in the vial.

Crystal data for **TPTCA-1** (100 K): Formula  $\text{C}_{22}\text{H}_{14}\text{O}_8$ ;  $M = 406.33$ , monoclinic  $C2/c$ , colorless block shape crystals;  $a = 16.4201(2) \text{ \AA}$ ,  $b = 26.5063(3) \text{ \AA}$ ,  $c = 7.19160(10) \text{ \AA}$ ,  $\beta = 114.8240(10)^\circ$ ;  $V = 2840.83(6) \text{ \AA}^3$ ;  $\rho = 0.950 \text{ g/cm}^3$ ;  $Z = 4$ ;  $\mu(\lambda = 0.6889 \text{ \AA}) = 0.069 \text{ mm}^{-1}$ ;  $F(000) = 840$ ; crystal size =  $0.042 \times 0.026 \times 0.02 \text{ mm}$ ;  $T = 100(2) \text{ K}$ . 2778 reflections measured ( $2.99 < 2\theta < 70.59^\circ$ ), 1998 unique ( $R_{int} = 0.0378$ ), 3176 ( $I > 2\sigma(I)$ );  $R_1 = 0.0482$  for observed and  $R_1 = 0.0568$  for all reflections;  $wR_2 = 0.1810$  for all reflections; max/min difference electron density =  $0.370$  and  $-0.291 \text{ e}\cdot\text{\AA}^{-3}$ ; data/restraints/parameters = 2778/0/144; GOF = 1.025. CCDC No. 2277047.

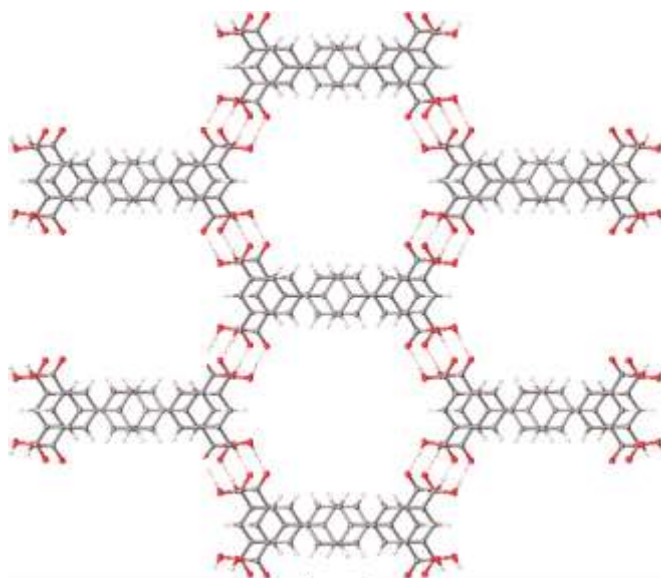

**Figure S3.** Crystal packing diagram of **TPTCA-1** recorded at 100 K from SCXRD viewed along the  $a$  axis. Hydrogen bonds are shown with red dashed lines. Grey: carbon, red: oxygen, white: hydrogen.

## 2.4 Formation of TPTCA-2

Firstly, the DMF and chloroform crystallisation solvents were removed with a syringe and 10 mL *n*-pentane was added to immerse the crystals fully. The *n*-pentane was refreshed every 12 hrs, and after using *n*-pentane to exchange the solvents for 5 days the crystals were degassed at RT for 2 hrs under a dynamic vacuum to afford the activated crystals, **TPTCA-2** (yield: 80 %).

Crystal data for **TPTCA-2** (291 K): Formula  $C_{22}H_{14}O_8$ ;  $M = 406.33$ , monoclinic  $I2/a$ , colorless block shape crystals;  $a = 7.3463(3) \text{ \AA}$ ,  $b = 26.5578(10) \text{ \AA}$ ,  $c = 15.1916(6) \text{ \AA}$ ,  $\beta = 92.149(4)^\circ$ ;  $V = 2961.8(2) \text{ \AA}^3$ ;  $\rho = 0.902 \text{ g/cm}^3$ ;  $Z = 4$ ;  $\mu(\text{Mo-K}\alpha) = 0.070 \text{ mm}^{-1}$ ;  $F(000) = 840$ ; crystal size =  $0.05 \times 0.032 \times 0.019 \text{ mm}$ ;  $T = 291(2) \text{ K}$ . 10816 reflections measured ( $5.35 < 2\theta < 58.79^\circ$ ), 3213 unique ( $R_{int} = 0.0189$ ), 2452 ( $I > 2\sigma(I)$ );  $R_1 = 0.0702$  for observed and  $R_1 = 0.0912$  for all reflections;  $wR_2 = 0.2699$  for all reflections; max/min difference electron density = 0.234 and  $-0.212 \text{ e}\cdot\text{\AA}^{-3}$ ; data/restraints/parameters = 3213/3/141; GOF = 1.125. CCDC No. 2277048.

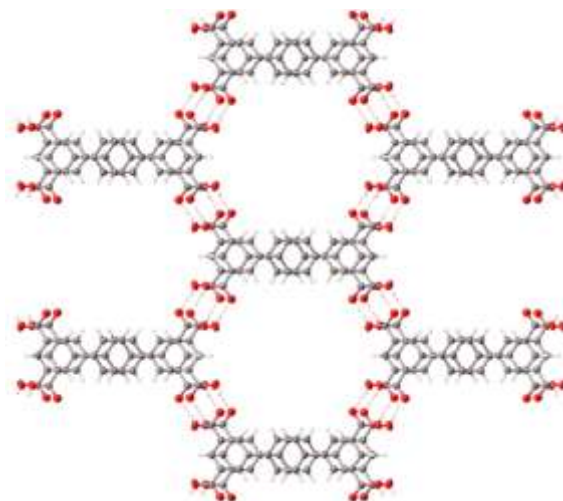

**Figure S4.** Crystal packing diagram of **TPTCA-2** recorded at 291 K viewed along the  $a$  axis. Hydrogen bonds are shown with red dashed lines. Grey: carbon, red: oxygen, white: hydrogen.



## 2.5 Formation of TPTCA-2\_degas

The **TPTCA-2** crystals were degassed at RT for 12 hrs and **TPTCA-2\_degas** was obtained.

Crystal data for **TPTCA-2\_degas** (211 K): Formula  $C_{22}H_{14}O_8$ ;  $M = 406.33$ , monoclinic  $I2/a$ , colorless block shape crystals;  $a = 9.364(4) \text{ \AA}$ ,  $b = 27.147(5) \text{ \AA}$ ,  $c = 10.077(5) \text{ \AA}$ ,  $\beta = 116.60(5)^\circ$ ;  $V = 2290.3(18) \text{ \AA}^3$ ;  $\rho = 1.178 \text{ g/cm}^3$ ;  $Z = 4$ ;  $\mu(\lambda = 0.6889 \text{ \AA}) = 0.091 \text{ mm}^{-1}$ ;  $F(000) = 840$ ; crystal size =  $0.04 \times 0.02 \times 0.015 \text{ mm}$ ;  $T = 211(2) \text{ K}$ . 1195 reflections measured ( $7.78 < 2\theta < 54.19^\circ$ ), 689 unique ( $R_{int} = 0.0924$ ), 582 ( $I > 2\sigma(I)$ );  $R_1 = 0.0618$  for observed and  $R_1 = 0.1059$  for all reflections;  $wR_2 = 0.1626$  for all reflections; max/min difference electron density = 0.233 and  $-0.194 \text{ e}\cdot\text{\AA}^{-3}$ ; data/restraints/parameters = 1195/6/140; GOF = 0.919. CCDC No. 2277049.

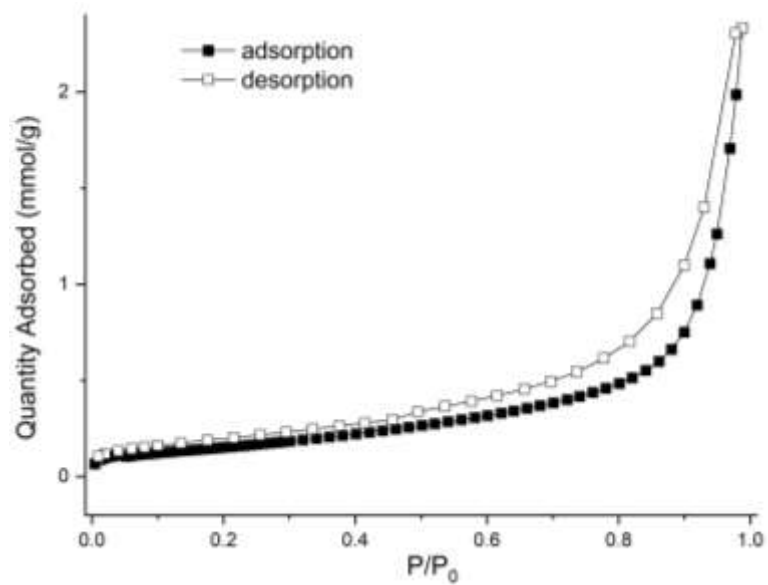

**Figure S5.** The N<sub>2</sub> sorption isotherms of **BPTCA-2** recorded at 77 K.

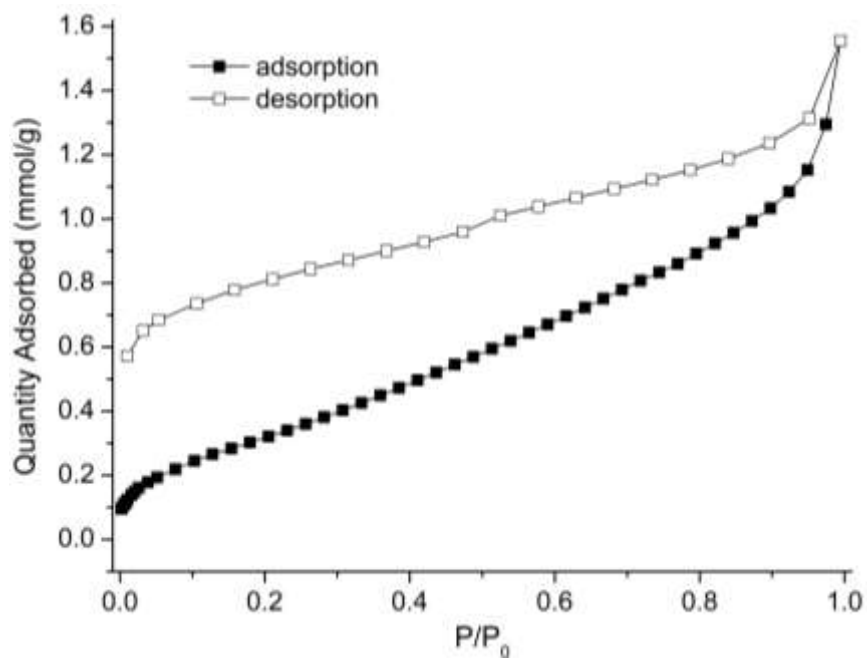

**Figure S6.** The N<sub>2</sub> sorption isotherms of TPTCA-2\_degas recorded at 77 K.

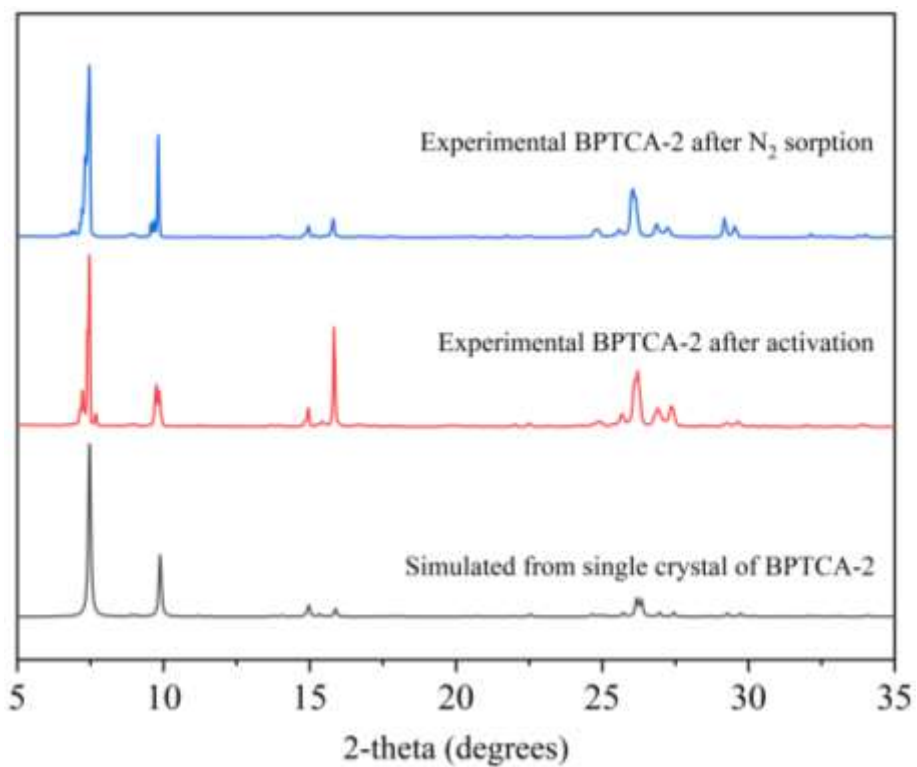

**Figure S7.** PXRD patterns of **BPTCA-2**. Black: simulation from the SC-XRD structure recorded at 292 K; red: experimental PXRD of **BPTCA-2** after activation; blue: experimental PXRD of **BPTCA-2** after the N<sub>2</sub> sorption test.

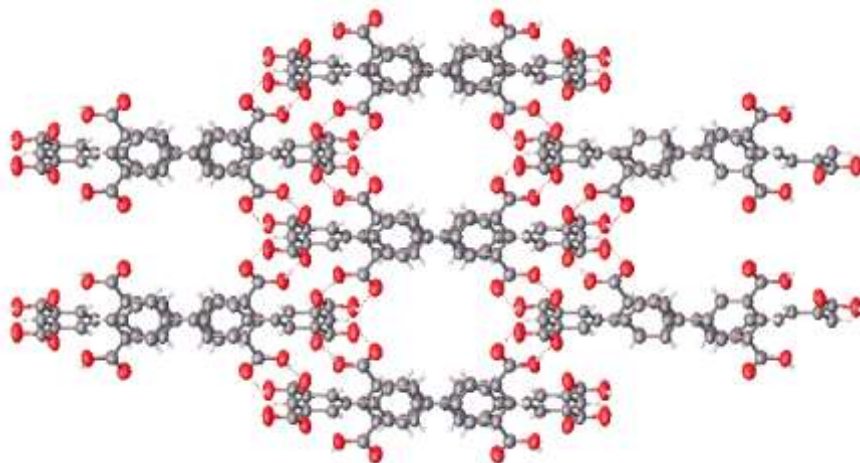

**Figure S8.** Crystal packing diagram of **TPTCA-2\_degas** recorded at 211 K viewed along the *a*-axis. Hydrogen bonds are shown with red dashed lines. Grey: carbon, red: oxygen, white: hydrogen.

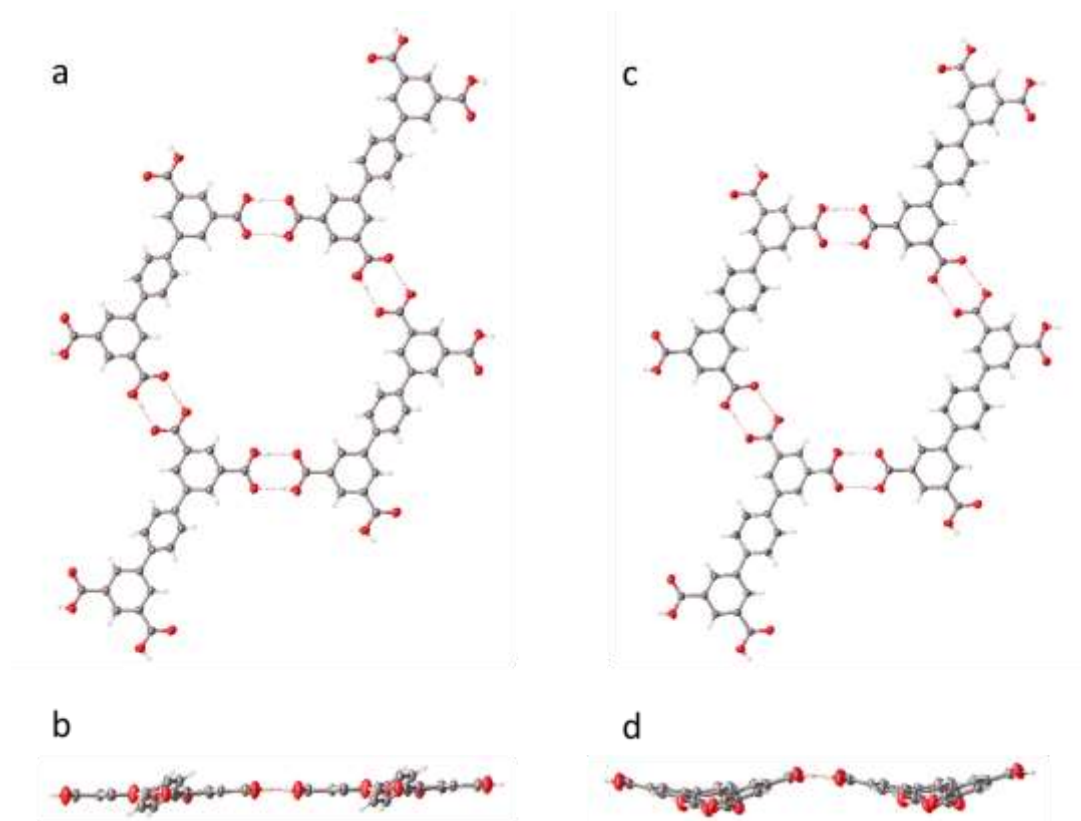

**Figure S9.** Comparison between the **sql** net in **TPTCA-2** (a) and side view (b); the **sql** net in **TPTCA-2\_degas** (c) and side view (d). Hydrogen bonds are shown with red dashed lines. Grey: carbon, red: oxygen, white: hydrogen.

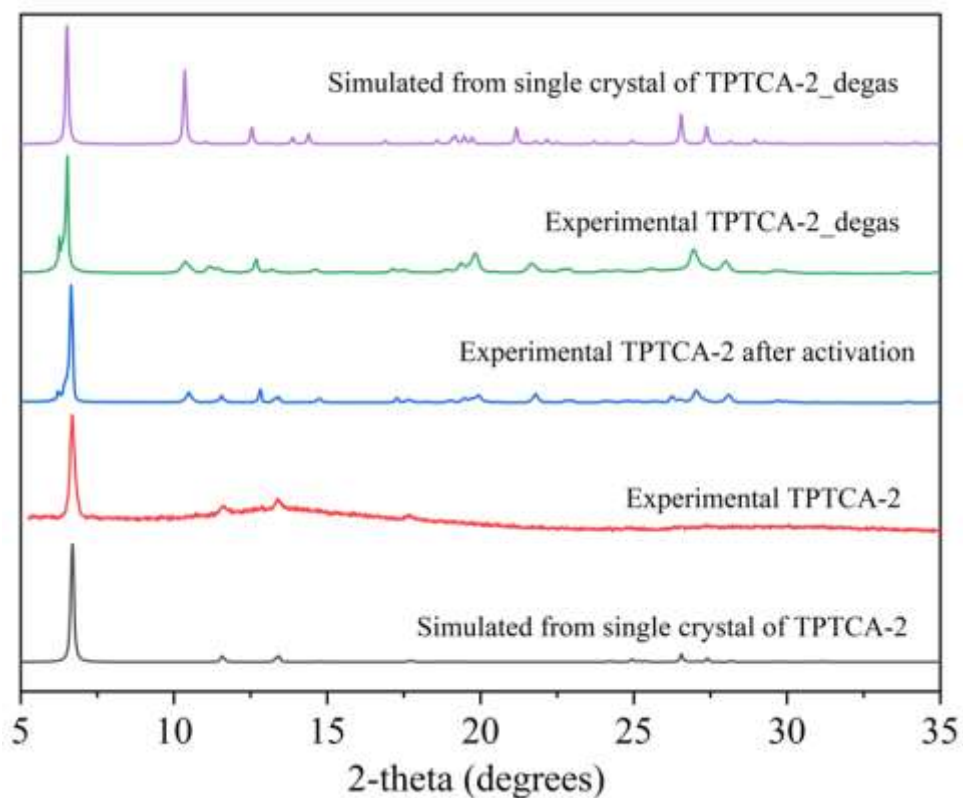

**Figure S10.** PXRD patterns of **TPTCA-2**. Black: simulation from the SC-XRD structure of **TPTCA-2**; red: experimental PXRD of **TPTCA-2**; blue: experimental PXRD of **TPTCA-2** after activation; green: experimental PXRD of **TPTCA-2\_degas**; purple: simulation from the SC-XRD structure of **TPTCA-2\_degas**.

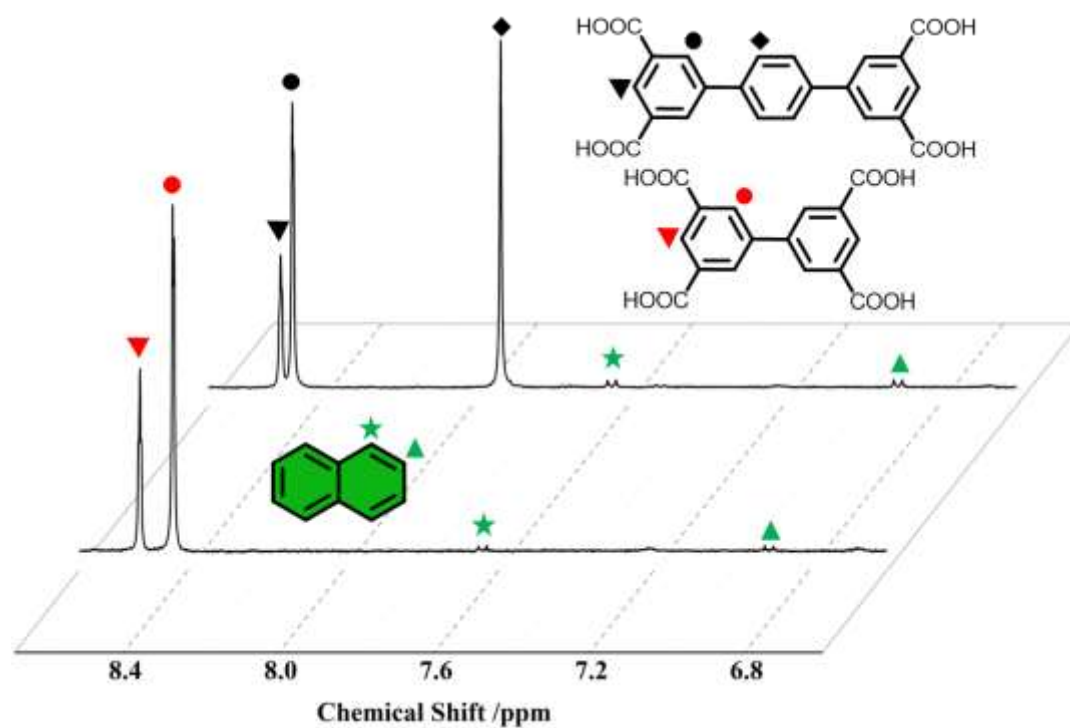

**Figure S11.** The  $^1\text{H}$  NMR spectrum ( $\text{DMSO-}d_6$ ) of **BPTCA-2>NA** and **TPTCA-2>NA**. The characteristic peaks of **BPTCA**, **TPTCA**, and **NA** molecules were marked with red, black, and green symbols, respectively.



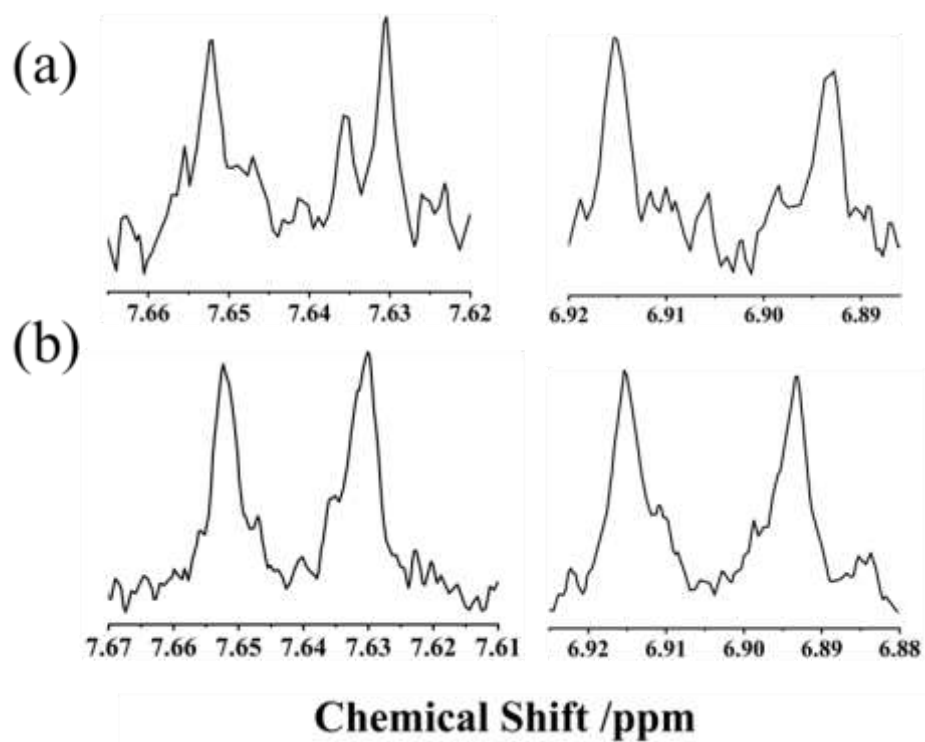

**Figure S12.** The amplifying  $^1\text{H}$  NMR spectrum of NA in (a) **BPTCA-2>NA**; (b) **TPTCA-2>NA**.

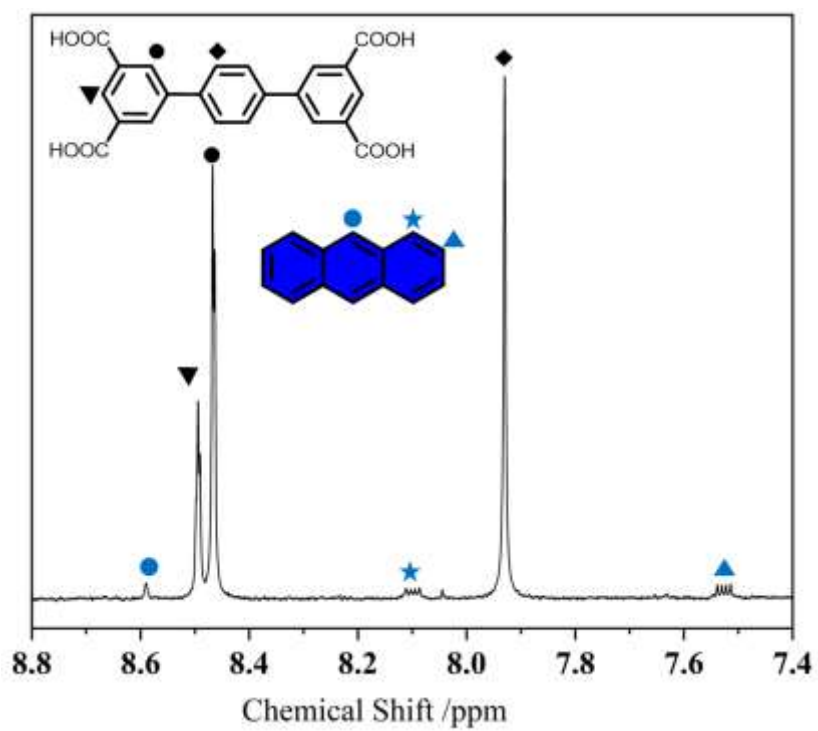

**Figure S13.** The  $^1\text{H}$  NMR spectrum ( $\text{DMSO-}d_6$ ) of **TPTCA-2** immersed in *n*-hexadecane solution containing 200 ppm of AN or NA for 3 hrs.

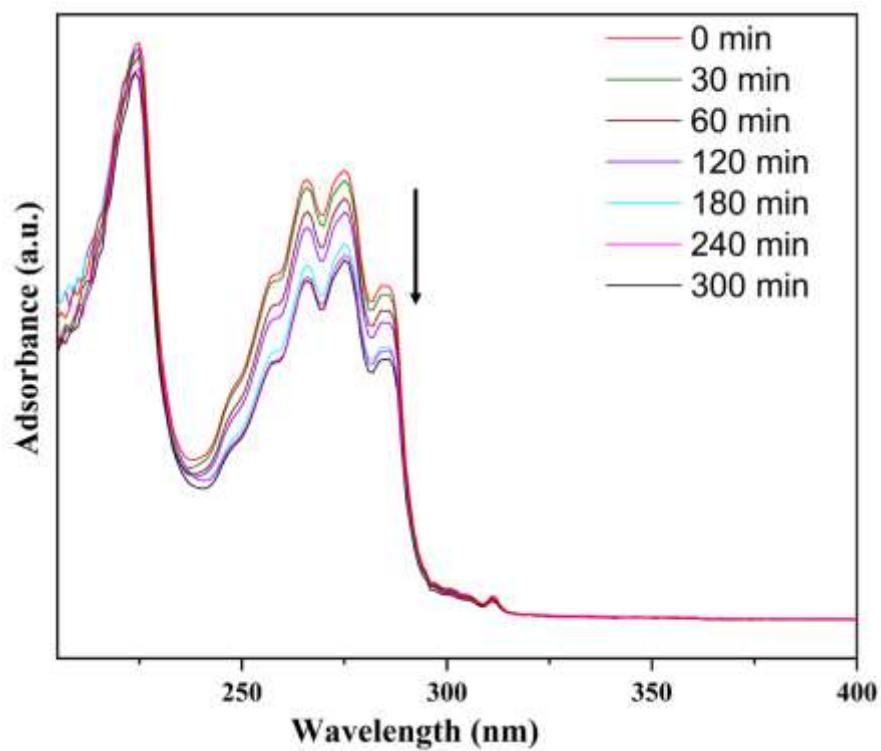

**Figure S14.** The UV spectrum of NA immersed in BPTCA-2 from the start of the measurement to 300 mins.

## References

- 1 G. M. Sheldrick, 2008.
- 2 L. Krause, R. Herbst-Irmer, G. M. Sheldrick and D. Stalke, *J. Appl. Crystallogr.*, 2015, **48**, 3–10.
- 3 G. Winter, D. G. Waterman, J. M. Parkhurst, A. S. Brewster, R. J. Gildea, M. Gerstel, L. Fuentes-Montero, M. Vollmar, T. Michels-Clark, I. D. Young, N. K. Sauter and G. Evans, *Acta Crystallogr. Sect. D Struct. Biol.*, 2018, **74**, 85–97.
- 4 G. M. Sheldrick, *Acta Crystallogr. Sect. A Found. Adv.*, 2015, **71**, 3–8.
- 5 G. M. Sheldrick, *Acta Crystallogr. Sect. A Found. Crystallogr.*, 2008, **64**, 112–122.
- 6 G. M. Sheldrick, *Acta Crystallogr. Sect. C Struct. Chem.*, 2015, **71**, 3–8.
- 7 O. V. Dolomanov, L. J. Bourhis, R. J. Gildea, J. A. K. Howard and H. Puschmann, *J. Appl. Crystallogr.*, 2009, **42**, 339–341.
